# Supplementary material for: Projection-dependent heterogeneity of cerebellar granule cell calcium responses
Source: PubMed Central journal article supplement (PMC8011397; doi:10.1186/s13041-021-00773-y), 2021-03-31
Supplement: 13041_2021_773_MOESM1_ESM.pdf [file 13041_2021_773_MOESM1_ESM.pdf]

**Additional file 1:**

**Figure S1.**

**Figure S2.**

**Figure S3.**

**Figure S4.**

**Figure S5.**

**Table S1.**

**Table S2**

## **Projection-dependent heterogeneity of cerebellar granule cell calcium responses**

Jun Kyu Rhee, Heeyoun Park, Taegon Kim, Yukio Yamamoto, and Keiko Tanaka-Yamamoto

**Figure S1**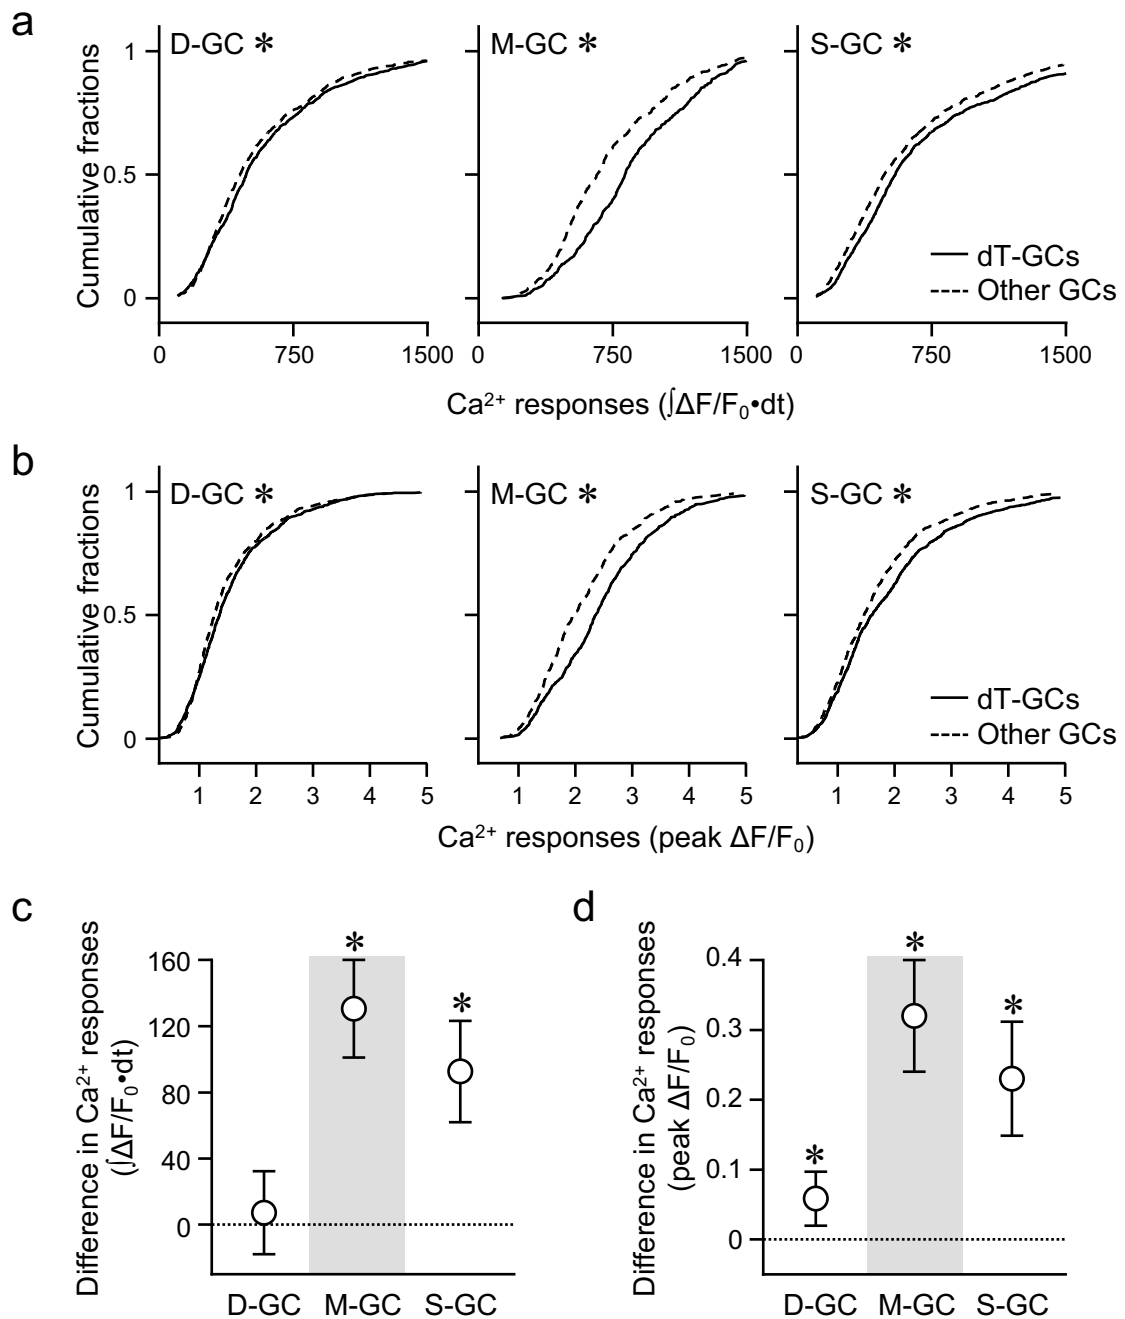

**Fig. S1** Consistent results of the difference between the dT-positive GCs and the other GCs in analyses using the unstandardized  $\int \Delta F/F_0 \cdot dt$  or the unstandardized peak  $\Delta F/F_0$ .

**a, b** The cumulative distributions of the unstandardized  $\int \Delta F/F_0 \cdot dt$  (**a**) or the unstandardized peak  $\Delta F/F_0$  (**b**) in D-GCs, M-GCs, and S-GCs (solid lines;  $n = 1060, 620,$  or  $1060$  cells for D-GCs, M-GCs, or S-GCs, respectively) compared with the distributions in other GCs (dotted lines;  $n = 1060, 620,$  or  $1060$  cells for D-GCs, M-GCs, or S-GCs, respectively). **c, d** Difference in  $\text{Ca}^{2+}$  responses, represented by the unstandardized  $\int \Delta F/F_0 \cdot dt$  (**c**) or the unstandardized peak  $\Delta F/F_0$  (**d**), between dT-positive GCs (D-GCs, M-GCs, or S-GCs) and other GCs in control (black open circles;  $n = 53, 31,$  or  $53$  slices for D-GCs, M-GCs, or S-GCs, respectively; for the comparison with 0,  $*p < 0.05$ , one-sample Wilcoxon signed rank test).

**Figure S2**

**a**

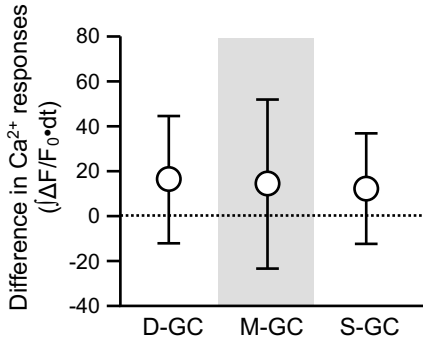

**b**

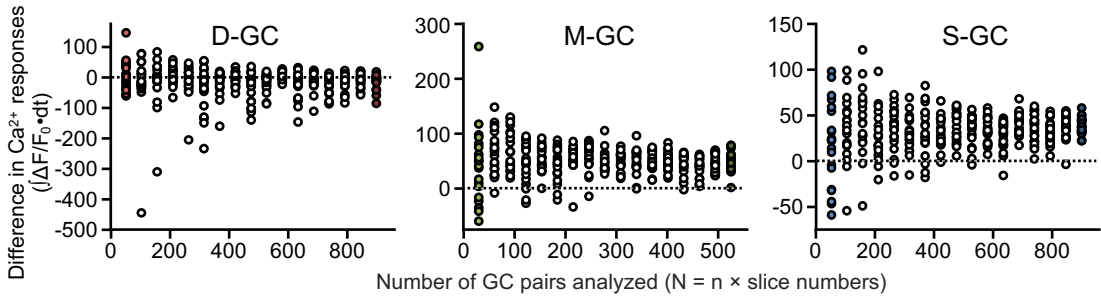

**c**

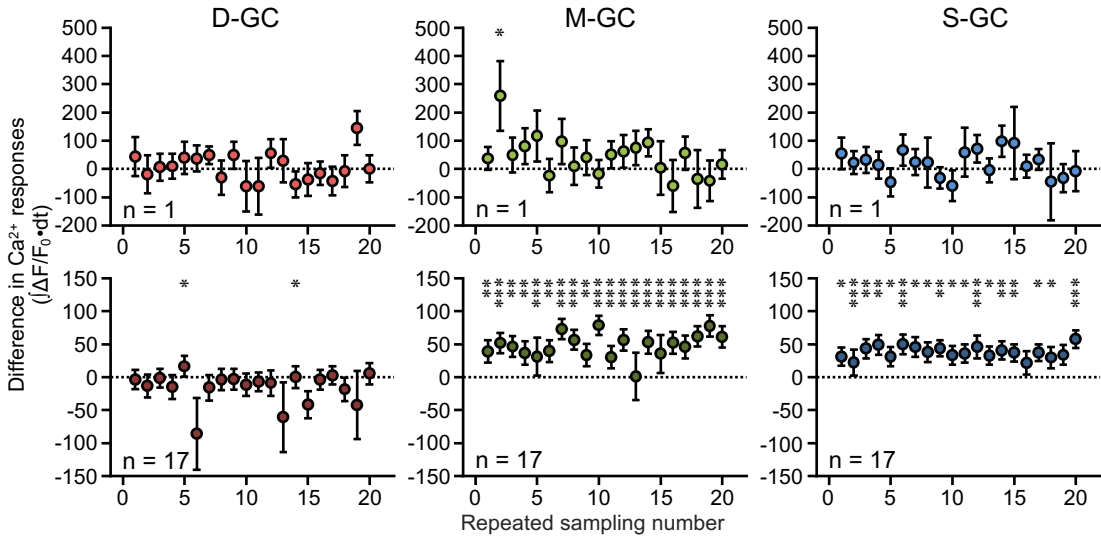

**d**

| Repeated sampling number | n = 1 pair sampled per slice |          |       | n = 17 pairs sampled per slice |                           |                           |
|--------------------------|------------------------------|----------|-------|--------------------------------|---------------------------|---------------------------|
|                          | D-GC                         | M-GC     | S-GC  | D-GC                           | M-GC                      | S-GC                      |
| 1                        | 1                            | 0.347    | 0.337 | 0.422                          | 0.00315 **                | 0.0392 *                  |
| 2                        | 0.46                         | 0.0132 * | 0.725 | 0.721                          | $3.43 \times 10^{-4}$ *** | $4.72 \times 10^{-4}$ *** |
| 3                        | 0.46                         | 0.189    | 0.706 | 0.418                          | 0.00105 **                | 0.0095 **                 |
| 4                        | 0.958                        | 0.182    | 0.648 | 0.235                          | 0.0099 **                 | 0.00719 **                |
| 5                        | 0.58                         | 0.224    | 0.772 | 0.0355 *                       | $9.75 \times 10^{-5}$ *** | 0.0171 *                  |
| 6                        | 0.586                        | 0.529    | 0.623 | 0.992                          | 0.00395 **                | $5.95 \times 10^{-4}$ *** |
| 7                        | 0.365                        | 0.357    | 0.316 | 0.222                          | $2.05 \times 10^{-7}$ *** | 0.0135 *                  |
| 8                        | 0.429                        | 0.931    | 0.923 | 0.327                          | $5.74 \times 10^{-5}$ *** | 0.0107 *                  |
| 9                        | 0.263                        | 0.399    | 0.568 | 0.574                          | 0.0011 **                 | 0.00178 **                |
| 10                       | 0.972                        | 0.542    | 0.574 | 0.862                          | $2.65 \times 10^{-8}$ *** | 0.0302 *                  |
| 11                       | 0.32                         | 0.239    | 0.466 | 0.662                          | $2.65 \times 10^{-4}$ *** | 0.0157 *                  |
| 12                       | 0.648                        | 0.378    | 0.075 | 0.643                          | $4.32 \times 10^{-6}$ *** | $4.25 \times 10^{-4}$ *** |
| 13                       | 0.909                        | 0.0942   | 0.93  | 0.344                          | $4.74 \times 10^{-4}$ *** | 0.0204 *                  |
| 14                       | 0.365                        | 0.176    | 0.143 | 0.0257 *                       | $1.85 \times 10^{-4}$ *** | 0.00264 **                |
| 15                       | 0.429                        | 0.794    | 0.106 | 0.823                          | $4.71 \times 10^{-5}$ *** | 0.00126 **                |
| 16                       | 0.979                        | 0.622    | 0.819 | 0.305                          | $3.92 \times 10^{-5}$ *** | 0.0889                    |
| 17                       | 0.895                        | 0.0502   | 0.499 | 0.653                          | $7.74 \times 10^{-4}$ *** | 0.0213 *                  |
| 18                       | 0.346                        | 0.664    | 0.155 | 0.521                          | $4.92 \times 10^{-6}$ *** | 0.0289 *                  |
| 19                       | 0.112                        | 0.678    | 0.493 | 0.0741                         | $3.78 \times 10^{-7}$ *** | 0.0509                    |
| 20                       | 0.868                        | 0.7665   | 0.586 | 0.091                          | $2.05 \times 10^{-5}$ *** | $3.37 \times 10^{-6}$ *** |

**Fig. S2** Analysis of neighboring GC pairs and the effects of sample numbers.

**a** Difference in  $\int \Delta F/F_0 \cdot dt$  between neighboring GC pairs of dT-positive GCs (D-GCs, M-GCs, or S-GCs) and other GCs in control ( $n = 50, 31, \text{ or } 53$  GC pairs for D-GCs, M-GCs, or S-GCs, respectively). **b-d** Difference in  $\int \Delta F/F_0 \cdot dt$  between randomly selected pairs of dT-positive GCs and other GCs in control. Averaged values of difference are plotted against numbers ( $N = \text{GC pairs sampled per slice } (n) \times \text{ number of slices}$ ) of pairs used for the analysis (**b**), which was repeated 20 times with a certain  $n$ . Data shown in color ( $n = 1$  and 17) are replotted in **c**, which are shown as average values with SEM. In addition,  $p$  values of individual data shown in **c** are listed in **d** (for comparison with 0,  $*p < 0.05$ ,  $**p < 0.01$ ,  $***p < 0.001$ , one-sample Wilcoxon signed rank test).

**Figure S3**

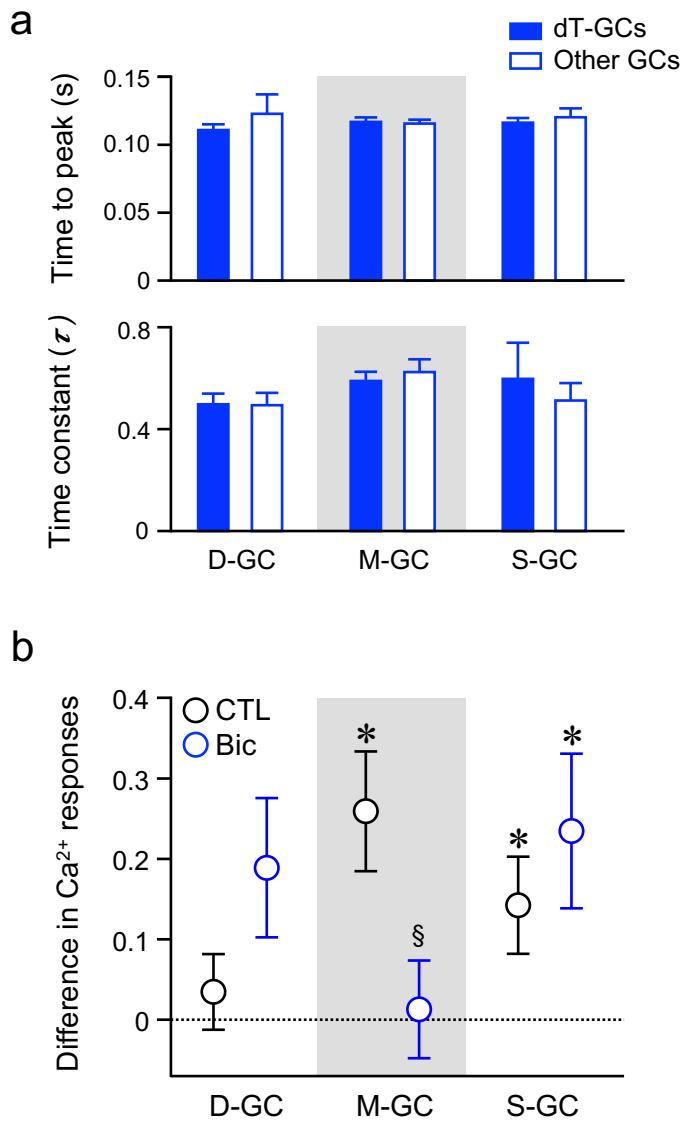

**Fig. S3** Time course profiles of the  $\text{Ca}^{2+}$  responses in the presence of bicuculline and analyses with 60 other GCs.

**a** Comparison of time to peak and the decay time constants of the  $\text{Ca}^{2+}$  responses between dT-positive GCs (D-GCs, M-GCs or S-GCs) and other GCs in the presence of bicuculline ( $n = 27, 39,$  or  $25$  slices for D-GCs, M-GCs, or S-GCs, respectively). **b** Difference in  $\text{Ca}^{2+}$  responses between dT-positive GCs and 60 other GCs in control (black open circles;  $n = 53, 31,$  or  $53$  slices for D-GCs, M-GCs, or S-GCs, respectively) or in the presence of bicuculline (blue open circles;  $n = 27, 39,$  or  $26$  slices for D-GCs, M-GCs, or S-GCs, respectively) (for the comparison with 0,  $*p < 0.05$ , one-sample Wilcoxon signed rank test; for comparison between control and bicuculline,  $\S p < 0.05$ , one-way ANOVA followed by the Fisher test).

## Figure S4

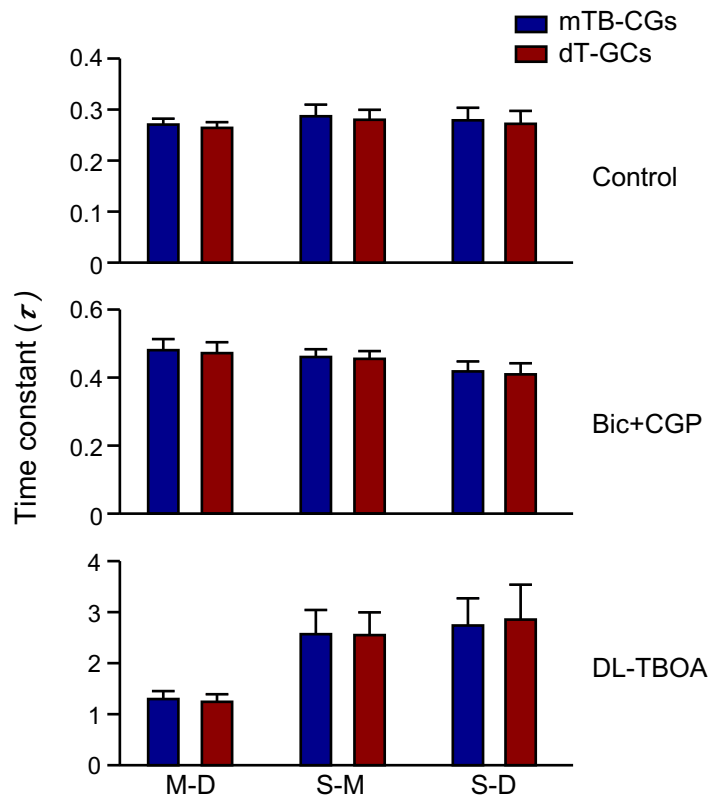

**Fig. S4** Comparison of decay time constants.

Comparison of the decay time constants of the  $\text{Ca}^{2+}$  responses between mTB-positive GCs and dT-positive GCs in control (top,  $n = 32, 33,$  or  $27$  slices for M-D, S-M, or S-D, respectively), in the presence of bicuculline and CGP (middle,  $n = 19, 18,$  or  $18$  for M-D, S-M, or S-D, respectively), or in the presence of DL-TBOA (bottom,  $n = 19, 12,$  or  $10$  for M-D, S-M, or S-D, respectively).

**Figure S5**

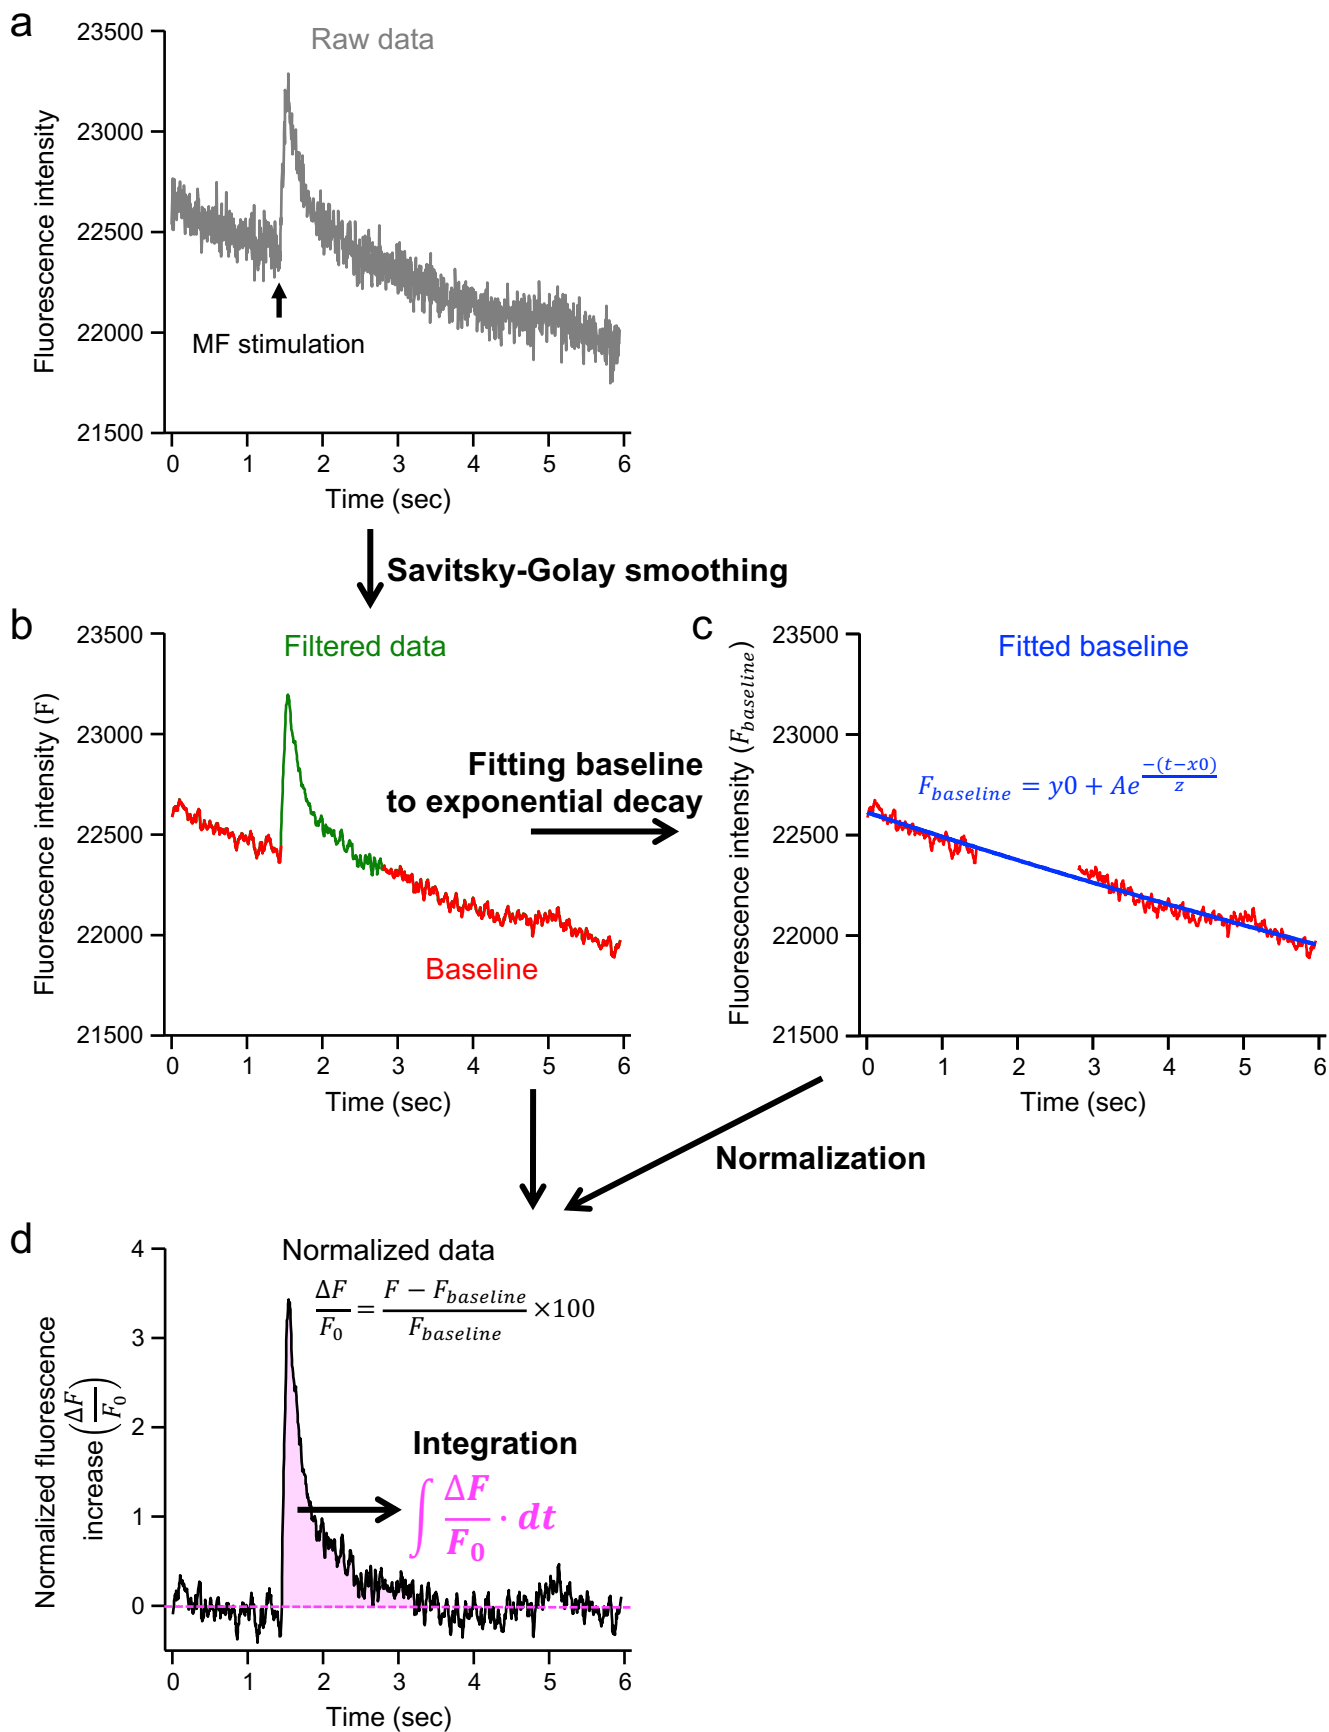

**Fig. S5** The flow chart of how to calculate the  $\text{Ca}^{2+}$  responses in individual GCs. **a** Raw data (gray) obtained by measuring the fluorescence intensity of OGB1 over time. **b** Filtered time course (green) was obtained by smoothing the raw data using Savitsky-Golay filtering. A part of time course before and after the MF stimulation-dependent  $\text{Ca}^{2+}$  increase (red) was used to estimate the baseline. **c** The baseline was estimated by fitting the part of time course with an exponential decay function (blue). **d** The normalized time course was calculated using an equation,  $\Delta F/F = (F - F_{\text{baseline}})/F_{\text{baseline}} \times 100$ , and the  $\text{Ca}^{2+}$  responses were calculated as  $\int \Delta F/F_0 \cdot dt$ . A data example shown in **a** is used in **b-d**.



**Table S1: Estimation of the effect size based on the calculation of percentage of the difference in  $\int \Delta F/F_0 \cdot dt$  between two GC groups in averaged total  $\int \Delta F/F_0 \cdot dt$  upon MF stimulation**

| Labeling       |                    | Inhibitors             | Difference in $Ca^{2+}$ responses ( $\int \Delta F/F_0 \cdot dt$ ) (a) | P-values and significance <sup>§</sup> |               | Average of total $Ca^{2+}$ increase in all GCs ( $\int \Delta F/F_0 \cdot dt$ ) (b) | Estimated % of the difference in $Ca^{2+}$ responses <sup>§§</sup> |
|----------------|--------------------|------------------------|------------------------------------------------------------------------|----------------------------------------|---------------|-------------------------------------------------------------------------------------|--------------------------------------------------------------------|
| Single/ Double | Compared GC groups |                        |                                                                        |                                        |               |                                                                                     |                                                                    |
| Single         | D-GCs & others     | –                      | 7.2 ± 25.1                                                             | 0.158                                  |               | 609.5 ± 11.3                                                                        | 1.18                                                               |
|                | M-GCs & others     | –                      | 130.6 ± 29.6                                                           | 1.07 × 10 <sup>-4</sup>                | ***           | 802.7 ± 10.6                                                                        | 16.27                                                              |
|                | S-GCs & others     | –                      | 92.6 ± 30.6                                                            | 9.09 × 10 <sup>-4</sup>                | ***           | 677.9 ± 12.1                                                                        | 13.66                                                              |
|                | D-GCs & others     | Bicuculline            | -14.3 ± 129.2                                                          | 0.0619                                 |               | 1314.1 ± 70.7                                                                       | 1.09                                                               |
|                | M-GCs & others     | Bicuculline            | 27.1 ± 141.0                                                           | 0.521                                  |               | 2928.1 ± 100.9                                                                      | 0.92                                                               |
|                | S-GCs & others     | Bicuculline            | 444.8 ± 212.1                                                          | 0.014                                  | *             | 1873.7 ± 92.3                                                                       | 23.74                                                              |
| Double         | M-GCs & D-GCs      | –                      | 32.7 ± 16.0                                                            | 0.028                                  | *             | 934.6 ± 17.9                                                                        | 3.49                                                               |
|                | S-GCs & M-GCs      | –                      | 2.3 ± 21.9                                                             | 0.646                                  |               | 840.1 ± 16.0                                                                        | 0.28                                                               |
|                | S-GCs & D-GCs      | –                      | 22.6 ± 22.8                                                            | 0.135                                  |               | 937.0 ± 21.7                                                                        | 2.41                                                               |
|                | M-GCs & D-GCs      | Bicuculline            | -31.3 ± 88.2                                                           | 0.517                                  |               | 6824.9 ± 325.4                                                                      | 0.46                                                               |
|                | S-GCs & M-GCs      | Bicuculline            | -25.0 ± 188.4                                                          | 0.58                                   |               | 3419.0 ± 167.8                                                                      | 0.73                                                               |
|                | S-GCs & D-GCs      | Bicuculline            | -126.9 ± 105.2                                                         | 0.625                                  |               | 4826.6 ± 292.0                                                                      | 2.63                                                               |
|                | M-GCs & D-GCs      | Bic+CGP+AP5+7CI        | 21.1 ± 17.2                                                            | 0.266                                  |               | 693.8 ± 23.1                                                                        | 3.04                                                               |
|                | S-GCs & M-GCs      | Bic+CGP+AP5+7CI        | 2.5 ± 16.6                                                             | 0.702                                  |               | 879.9 ± 21.5                                                                        | 0.29                                                               |
|                | S-GCs & D-GCs      | Bic+CGP+AP5+7CI        | 31.4 ± 26.6                                                            | 0.623                                  |               | 976.5 ± 29.8                                                                        | 3.22                                                               |
|                | M-GCs & D-GCs      | Bic+CGP                | 208.6 ± 101.8                                                          | 0.0258                                 | *             | 4095.2 ± 129.7                                                                      | 5.09                                                               |
|                | S-GCs & M-GCs      | Bic+CGP                | 91.5 ± 57.1                                                            | 0.13                                   |               | 2065.1 ± 66.2                                                                       | 4.43                                                               |
|                | S-GCs & D-GCs      | Bic+CGP                | 70.1 ± 78.0                                                            | 0.154                                  |               | 2563.2 ± 110.8                                                                      | 2.73                                                               |
|                | M-GCs & D-GCs      | DL-TBOA                | 512.9 ± 162.3                                                          | 0.0024                                 | **            | 8431.4 ± 375.7                                                                      | 6.08                                                               |
|                | S-GCs & M-GCs      | DL-TBOA                | 658.3 ± 725.6                                                          | 0.176                                  |               | 32555.3 ± 1838.9                                                                    | 2.02                                                               |
|                | S-GCs & D-GCs      | DL-TBOA <sup>§§§</sup> | 3503.8 ± 2030.4                                                        | 0.131                                  | (*)           | 36593.0 ± 3188.3                                                                    | 9.58                                                               |
|                | M-GCs & D-GCs      | CGP                    | -30.6 ± 21.2                                                           | 0.291                                  |               | 1327.9 ± 24.3                                                                       | 2.3                                                                |
|                | S-GCs & M-GCs      | CGP                    | -2.7 ± 39.2                                                            | 0.685                                  |               | 1073.1 ± 33.7                                                                       | 0.25                                                               |
|                | S-GCs & D-GCs      | CGP                    | -17.9 ± 21.6                                                           | 0.469                                  |               | 584.7 ± 20.5                                                                        | 3.07                                                               |
|                | M-GCs & D-GCs      | SNAP+SKF               | -73.3 ± 28.4                                                           | 0.0219                                 | *             | 1092.4 ± 33.3                                                                       | 6.71                                                               |
|                | S-GCs & M-GCs      | SNAP+SKF               | 103.0 ± 59.9                                                           | 0.0107                                 | *             | 2197.1 ± 92.0                                                                       | 4.69                                                               |
|                | S-GCs & D-GCs      | SNAP+SKF               | 89.1 ± 30.7                                                            | 0.0134                                 | *             | 1018.2 ± 27.7                                                                       | 8.75                                                               |
|                | M-GCs & D-GCs      | Bic+AP5+7CI            | 18.2 ± 32.2                                                            | 0.594                                  |               | 1056.8 ± 22.3                                                                       | 1.72                                                               |
| S-GCs & M-GCs  | Bic+AP5+7CI        | 5.5 ± 50.5             | 0.664                                                                  |                                        | 1816.0 ± 48.8 | 0.3                                                                                 |                                                                    |
| S-GCs & D-GCs  | Bic+AP5+7CI        | 47.3 ± 43.9            | 0.329                                                                  |                                        | 923.8 ± 39.1  | 5.12                                                                                |                                                                    |

<sup>§</sup> Statistical test was performed by one sample Wilcoxon S-R test that examines significant difference with test median 0 (\*  $p < 0.05$ , \*\*  $p < 0.01$ , \*\*\*  $p < 0.001$ ).

<sup>§§</sup> Percentage of the difference = |mean of (a)/mean of (b)| × 100

<sup>§§§</sup> In case of comparison between S-GCs and M-GCs in the presence of DL-TBOA, significant difference was detected when standardized  $\int \Delta F/F_0 \cdot dt$  was used for statistical test, despite no significant difference in unstandardized  $\int \Delta F/F_0 \cdot dt$ .

**Table S2: P values and statistical tests**

| Figures     | Conditions/<br>Groups                                           | Pair compared                                       |                 | P value                  | Significance <sup>§</sup> | Test                 |
|-------------|-----------------------------------------------------------------|-----------------------------------------------------|-----------------|--------------------------|---------------------------|----------------------|
| Fig. 1d     | CNQX&AP5                                                        | Before                                              | After           | 2.06 X 10 <sup>-4</sup>  | ***                       | Paired sample t-test |
| Fig. 2d     |                                                                 | D-GCs                                               | M-GCs S-GCs     | 0.574                    |                           | One-way ANOVA        |
| Fig. 3b     | Control<br>(Time to peak)                                       | D-GCs, M-GCs, S-GCs, and their other GCs            |                 | 0.158                    |                           | One-way ANOVA        |
|             |                                                                 | D-GCs                                               | Other GCs       | 0.916                    |                           | Fisher test          |
|             |                                                                 | M-GCs                                               | Other GCs       | 0.882                    |                           | Fisher test          |
|             |                                                                 | S-GCs                                               | Other GCs       | 0.955                    |                           | Fisher test          |
|             | Control<br>(Decay time constant)                                | D-GCs, M-GCs, S-GCs, and their other GCs            |                 | 0.587                    |                           | One-way ANOVA        |
|             |                                                                 | D-GCs                                               | Other GCs       | 0.899                    |                           | Fisher test          |
|             |                                                                 | M-GCs                                               | Other GCs       | 0.653                    |                           | Fisher test          |
|             |                                                                 | S-GCs                                               | Other GCs       | 0.837                    |                           | Fisher test          |
| Fig. 3c     | Control<br>(Standardized $\int\Delta F/F_0 \cdot dt$ )          | D-GCs                                               | Other GCs       | 0.0098                   | **                        | KS test              |
|             |                                                                 | M-GCs                                               | Other GCs       | 7.32 X 10 <sup>-23</sup> | ***                       | KS test              |
|             |                                                                 | S-GCs                                               | Other GCs       | 6.93 X 10 <sup>-19</sup> | ***                       | KS test              |
| Fig. 3d     | Control<br>(Standardized $\int\Delta F/F_0 \cdot dt$ )          | D-GCs                                               | (Test median 0) | 0.118                    |                           | Wilcoxon S-R test    |
|             |                                                                 | M-GCs                                               | (Test median 0) | 1.07 X 10 <sup>-4</sup>  | ***                       | Wilcoxon S-R test    |
|             |                                                                 | S-GCs                                               | (Test median 0) | 6.16 X 10 <sup>-4</sup>  | ***                       | Wilcoxon S-R test    |
|             | Control<br>(Standardized peak $\Delta F/F_0$ )                  | D-GCs                                               | (Test median 0) | 0.0384                   | *                         | Wilcoxon S-R test    |
|             |                                                                 | M-GCs                                               | (Test median 0) | 1.31 X 10 <sup>-4</sup>  | ***                       | Wilcoxon S-R test    |
|             |                                                                 | S-GCs                                               | (Test median 0) | 0.00495                  | **                        | Wilcoxon S-R test    |
|             | Bicuculline<br>(Standardized $\int\Delta F/F_0 \cdot dt$ )      | D-GCs                                               | (Test median 0) | 0.0731                   |                           | Wilcoxon S-R test    |
|             |                                                                 | M-GCs                                               | (Test median 0) | 0.799                    |                           | Wilcoxon S-R test    |
|             |                                                                 | S-GCs                                               | (Test median 0) | 0.019                    | *                         | Wilcoxon S-R test    |
|             | Bicuculline<br>(Standardized peak $\Delta F/F_0$ )              | D-GCs                                               | (Test median 0) | 0.0585                   |                           | Wilcoxon S-R test    |
|             |                                                                 | M-GCs                                               | (Test median 0) | 0.167                    |                           | Wilcoxon S-R test    |
|             |                                                                 | S-GCs                                               | (Test median 0) | 0.0176                   | *                         | Wilcoxon S-R test    |
|             | Multiple comparison of standardized $\int\Delta F/F_0 \cdot dt$ | D-GCs, M-GCs, and S-GCs with or without bicuculline |                 | 0.00508                  | **                        | One-way ANOVA        |
|             |                                                                 | D-GCs (CTL)                                         | D-GCs (Bic)     | 0.294                    |                           | Fisher test          |
|             |                                                                 | M-GCs (CTL)                                         | M-GCs (Bic)     | 5.8 X 10 <sup>-4</sup>   | ***                       | Fisher test          |
|             |                                                                 | S-GCs (CTL)                                         | S-GCs (Bic)     | 0.71                     |                           | Fisher test          |
|             |                                                                 | All (CTL)                                           | All (Bic)       | 0.252                    |                           | Two-way ANOVA        |
|             | Multiple comparison of standardized peak $\Delta F/F_0$         | D-GCs, M-GCs, and S-GCs with or without bicuculline |                 | 0.0514                   |                           | One-way ANOVA        |
|             |                                                                 | D-GCs (CTL)                                         | D-GCs (Bic)     | 0.331                    |                           | Fisher test          |
|             |                                                                 | M-GCs (CTL)                                         | M-GCs (Bic)     | 0.0103                   | *                         | Fisher test          |
| S-GCs (CTL) |                                                                 | S-GCs (Bic)                                         | 0.343           |                          | Fisher test               |                      |
| All (CTL)   |                                                                 | All (Bic)                                           | 0.718           |                          | Two-way ANOVA             |                      |

<sup>§</sup> Significance, \*  $p < 0.05$ , \*\*  $p < 0.01$ , \*\*\*  $p < 0.001$ .

**Table S2 (continued)**

| Figures                    | Conditions/<br>Groups                             | Pair compared                                              |                            | P value                  | Significance <sup>§</sup> | Test              |               |
|----------------------------|---------------------------------------------------|------------------------------------------------------------|----------------------------|--------------------------|---------------------------|-------------------|---------------|
| Fig. 3d<br>(Continued)     | Control                                           | Standardized<br>ΔF/F0•dt                                   | Standardized<br>peak ΔF/F0 | 0.642                    |                           | Two-way ANOVA     |               |
|                            | Bicuculline                                       | Standardized<br>ΔF/F0•dt                                   | Standardized<br>peak ΔF/F0 | 0.305                    |                           | Two-way ANOVA     |               |
| Fig. 3e                    |                                                   | Control                                                    | Bicuculline                | 0                        | ***                       | Mann-Whitney test |               |
| Fig. 3f                    | Bicuculline<br>(Standardized<br>ΔF/F0•dt)         | D-GCs                                                      | Other GCs                  | 7.05 X 10 <sup>-7</sup>  | ***                       | KS test           |               |
|                            |                                                   | M-GCs                                                      | Other GCs                  | 0.0204                   | *                         | KS test           |               |
|                            |                                                   | S-GCs                                                      | Other GCs                  | 1.96 X 10 <sup>-14</sup> | ***                       | KS test           |               |
| Fig. 4b, 4c,<br>5b, 5c, 5d | Control<br>(Standardized<br>ΔF/F0•dt)             | M-D                                                        | (Test median 0)            | 0.00934                  | **                        | Wilcoxon S-R test |               |
|                            |                                                   | S-M                                                        | (Test median 0)            | 0.621                    |                           | Wilcoxon S-R test |               |
|                            |                                                   | S-D                                                        | (Test median 0)            | 0.0859                   |                           | Wilcoxon S-R test |               |
|                            | Bicuculline<br>(Standardized<br>ΔF/F0•dt)         | M-D                                                        | (Test median 0)            | 0.342                    |                           | Wilcoxon S-R test |               |
|                            |                                                   | S-M                                                        | (Test median 0)            | 0.609                    |                           | Wilcoxon S-R test |               |
|                            |                                                   | S-D                                                        | (Test median 0)            | 0.232                    |                           | Wilcoxon S-R test |               |
|                            | Bic+CGP+AP5+<br>7Cl<br>(Standardized<br>ΔF/F0•dt) | M-D                                                        | (Test median 0)            | 0.339                    |                           | Wilcoxon S-R test |               |
|                            |                                                   | S-M                                                        | (Test median 0)            | 0.304                    |                           | Wilcoxon S-R test |               |
|                            |                                                   | S-D                                                        | (Test median 0)            | 0.568                    |                           | Wilcoxon S-R test |               |
|                            | Bic+CGP<br>(Standardized<br>ΔF/F0•dt)             | M-D                                                        | (Test median 0)            | 0.0494                   | *                         | Wilcoxon S-R test |               |
|                            |                                                   | S-M                                                        | (Test median 0)            | 0.0814                   |                           | Wilcoxon S-R test |               |
|                            |                                                   | S-D                                                        | (Test median 0)            | 0.0987                   |                           | Wilcoxon S-R test |               |
|                            | CGP<br>(Standardized<br>ΔF/F0•dt)                 | M-D                                                        | (Test median 0)            | 0.515                    |                           | Wilcoxon S-R test |               |
|                            |                                                   | S-M                                                        | (Test median 0)            | 0.635                    |                           | Wilcoxon S-R test |               |
|                            |                                                   | S-D                                                        | (Test median 0)            | 0.469                    |                           | Wilcoxon S-R test |               |
|                            | SNAP+SKF<br>(Standardized<br>ΔF/F0•dt)            | M-D                                                        | (Test median 0)            | 0.0393                   | *                         | Wilcoxon S-R test |               |
|                            |                                                   | S-M                                                        | (Test median 0)            | 0.0134                   | *                         | Wilcoxon S-R test |               |
|                            |                                                   | S-D                                                        | (Test median 0)            | 0.0134                   | *                         | Wilcoxon S-R test |               |
|                            | DL-TBOA<br>(Standardized<br>ΔF/F0•dt)             | M-D                                                        | (Test median 0)            | 2.67 X 10 <sup>-4</sup>  | ***                       | Wilcoxon S-R test |               |
|                            |                                                   | S-M                                                        | (Test median 0)            | 0.129                    |                           | Wilcoxon S-R test |               |
|                            |                                                   | S-D                                                        | (Test median 0)            | 0.0371                   | *                         | Wilcoxon S-R test |               |
|                            | Bic+AP5+7Cl<br>(Standardized<br>ΔF/F0•dt)         | M-D                                                        | (Test median 0)            | 0.4                      |                           | Wilcoxon S-R test |               |
|                            |                                                   | S-M                                                        | (Test median 0)            | 0.839                    |                           | Wilcoxon S-R test |               |
|                            |                                                   | S-D                                                        | (Test median 0)            | 0.0858                   |                           | Wilcoxon S-R test |               |
|                            | Multiple<br>comparison                            | M-D (8 different conditions with or<br>without inhibitors) |                            |                          | 9.05 X 10 <sup>-5</sup>   | ***               | One-way ANOVA |
|                            | M-D                                               | Control                                                    | Bicuculline                |                          | 3.22 X 10 <sup>-4</sup>   | ***               | Fisher test   |
|                            |                                                   | Control                                                    | Bic+CGP+AP5+7Cl            |                          | 0.481                     |                   | Fisher test   |
|                            |                                                   | Control                                                    | Bic+CGP                    |                          | 0.685                     |                   | Fisher test   |
|                            |                                                   | Control                                                    | CGP                        |                          | 0.011                     | *                 | Fisher test   |
|                            |                                                   | Control                                                    | SNAP+SKF                   |                          | 0.00103                   | **                | Fisher test   |
| Control                    |                                                   | DL-TBOA                                                    |                            | 0.319                    |                           | Fisher test       |               |

<sup>§</sup> Significance, \*  $p < 0.05$ , \*\*  $p < 0.01$ , \*\*\*  $p < 0.001$ .

**Table S2 (continued)**

| Figures                                   | Conditions/<br>Groups | Pair compared                                           |                 | <i>P</i> value          | Significance <sup>§</sup> | Test          |
|-------------------------------------------|-----------------------|---------------------------------------------------------|-----------------|-------------------------|---------------------------|---------------|
| Fig. 4b, 4c,<br>5b, 5c, 5d<br>(Continued) | M-D                   | Control                                                 | Bic+AP5+7Cl     | 0.151                   |                           | Fisher test   |
|                                           |                       | Bicuculline                                             | Bic+CGP+AP5+7Cl | 0.0233                  | *                         | Fisher test   |
|                                           |                       | Bicuculline                                             | Bic+CGP         | 0.00364                 | **                        | Fisher test   |
|                                           |                       | Bicuculline                                             | CGP             | 0.177                   |                           | Fisher test   |
|                                           |                       | Bicuculline                                             | SNAP+SKF        | 0.504                   |                           | Fisher test   |
|                                           |                       | Bicuculline                                             | DL-TBOA         | 4.81 X 10 <sup>-5</sup> | ***                       | Fisher test   |
|                                           |                       | Bicuculline                                             | Bic+AP5+7Cl     | 0.0203                  | *                         | Fisher test   |
|                                           |                       | Bic+CGP+AP5+7Cl                                         | Bic+CGP         | 0.743                   |                           | Fisher test   |
|                                           |                       | Bic+CGP+AP5+7Cl                                         | CGP             | 0.209                   |                           | Fisher test   |
|                                           |                       | Bic+CGP+AP5+7Cl                                         | SNAP+SKF        | 0.0647                  |                           | Fisher test   |
|                                           |                       | Bic+CGP+AP5+7Cl                                         | DL-TBOA         | 0.153                   |                           | Fisher test   |
|                                           |                       | Bic+CGP+AP5+7Cl                                         | Bic+AP5+7Cl     | 0.692                   |                           | Fisher test   |
|                                           |                       | Bic+CGP                                                 | CGP             | 0.0648                  |                           | Fisher test   |
|                                           |                       | Bic+CGP                                                 | SNAP+SKF        | 0.0119                  | *                         | Fisher test   |
|                                           |                       | Bic+CGP                                                 | DL-TBOA         | 0.209                   |                           | Fisher test   |
|                                           |                       | Bic+CGP                                                 | Bic+AP5+7Cl     | 0.389                   |                           | Fisher test   |
|                                           |                       | CGP                                                     | SNAP+SKF        | 0.448                   |                           | Fisher test   |
|                                           |                       | CGP                                                     | DL-TBOA         | 0.00157                 | **                        | Fisher test   |
|                                           |                       | CGP                                                     | Bic+AP5+7Cl     | 0.273                   |                           | Fisher test   |
|                                           |                       | SNAP+SKF                                                | DL-TBOA         | 1.46 X 10 <sup>-4</sup> | ***                       | Fisher test   |
|                                           | SNAP+SKF              | Bic+AP5+7Cl                                             | 0.0651          |                         | Fisher test               |               |
|                                           | DL-TBOA               | Bic+AP5+7Cl                                             | 0.0272          | *                       | Fisher test               |               |
|                                           | Multiple comparison   | S-M (8 different conditions with or without inhibitors) |                 | 0.825                   |                           | One-way ANOVA |
|                                           | S-M                   | Control                                                 | Bicuculline     | 0.69                    |                           | Fisher test   |
|                                           |                       | Control                                                 | Bic+CGP+AP5+7Cl | 0.478                   |                           | Fisher test   |
|                                           |                       | Control                                                 | Bic+CGP         | 0.238                   |                           | Fisher test   |
|                                           |                       | Control                                                 | CGP             | 0.809                   |                           | Fisher test   |
| Control                                   |                       | SNAP+SKF                                                | 0.312           |                         | Fisher test               |               |
| Control                                   |                       | DL-TBOA                                                 | 0.28            |                         | Fisher test               |               |
| Control                                   |                       | Bic+AP5+7Cl                                             | 0.891           |                         | Fisher test               |               |
| Bicuculline                               |                       | Bic+CGP+AP5+7Cl                                         | 0.784           |                         | Fisher test               |               |
| Bicuculline                               |                       | Bic+CGP                                                 | 0.491           |                         | Fisher test               |               |
| Bicuculline                               |                       | CGP                                                     | 0.918           |                         | Fisher test               |               |
| Bicuculline                               |                       | SNAP+SKF                                                | 0.563           |                         | Fisher test               |               |
| Bicuculline                               |                       | DL-TBOA                                                 | 0.506           |                         | Fisher test               |               |
| Bicuculline                               |                       | Bic+AP5+7Cl                                             | 0.611           |                         | Fisher test               |               |
| Bic+CGP+AP5+7Cl                           |                       | Bic+CGP                                                 | 0.678           |                         | Fisher test               |               |
| Bic+CGP+AP5+7Cl                           | CGP                   | 0.724                                                   |                 | Fisher test             |                           |               |

<sup>§</sup> Significance, \* *p* < 0.05, \*\* *p* < 0.01, \*\*\* *p* < 0.001.

**Table S2 (continued)**

| Figures                                   | Conditions/<br>Groups | Pair compared       |                                                         | P value     | Significance <sup>§</sup> | Test        |
|-------------------------------------------|-----------------------|---------------------|---------------------------------------------------------|-------------|---------------------------|-------------|
| Fig. 4b, 4c,<br>5b, 5c, 5d<br>(Continued) | S-M                   | Bic+CGP+AP5+7Cl     | SNAP+SKF                                                | 0.747       |                           | Fisher test |
|                                           |                       | Bic+CGP+AP5+7Cl     | DL-TBOA                                                 | 0.674       |                           | Fisher test |
|                                           |                       | Bic+CGP+AP5+7Cl     | Bic+AP5+7Cl                                             | 0.414       |                           | Fisher test |
|                                           |                       | Bic+CGP             | CGP                                                     | 0.463       |                           | Fisher test |
|                                           |                       | Bic+CGP             | SNAP+SKF                                                | 0.947       |                           | Fisher test |
|                                           |                       | Bic+CGP             | DL-TBOA                                                 | 0.961       |                           | Fisher test |
|                                           |                       | Bic+CGP             | Bic+AP5+7Cl                                             | 0.2         |                           | Fisher test |
|                                           |                       | CGP                 | SNAP+SKF                                                | 0.527       |                           | Fisher test |
|                                           |                       | CGP                 | DL-TBOA                                                 | 0.476       |                           | Fisher test |
|                                           |                       | CGP                 | Bic+AP5+7Cl                                             | 0.731       |                           | Fisher test |
|                                           |                       | SNAP+SKF            | DL-TBOA                                                 | 0.916       |                           | Fisher test |
|                                           |                       | SNAP+SKF            | Bic+AP5+7Cl                                             | 0.268       |                           | Fisher test |
|                                           |                       | DL-TBOA             | Bic+AP5+7Cl                                             | 0.242       |                           | Fisher test |
|                                           |                       | Multiple comparison | S-D (8 different conditions with or without inhibitors) |             | 0.153                     |             |
|                                           | S-D                   | Control             | Bicuculline                                             | 0.0944      |                           | Fisher test |
|                                           |                       | Control             | Bic+CGP+AP5+7Cl                                         | 0.462       |                           | Fisher test |
|                                           |                       | Control             | Bic+CGP                                                 | 0.942       |                           | Fisher test |
|                                           |                       | Control             | CGP                                                     | 0.117       |                           | Fisher test |
|                                           |                       | Control             | SNAP+SKF                                                | 0.537       |                           | Fisher test |
|                                           |                       | Control             | DL-TBOA                                                 | 0.175       |                           | Fisher test |
|                                           |                       | Control             | Bic+AP5+7Cl                                             | 0.835       |                           | Fisher test |
|                                           |                       | Bicuculline         | Bic+CGP+AP5+7Cl                                         | 0.304       |                           | Fisher test |
|                                           |                       | Bicuculline         | Bic+CGP                                                 | 0.104       |                           | Fisher test |
|                                           |                       | Bicuculline         | CGP                                                     | 0.927       |                           | Fisher test |
|                                           |                       | Bicuculline         | SNAP+SKF                                                | 0.0477      | *                         | Fisher test |
|                                           |                       | Bicuculline         | DL-TBOA                                                 | 0.013       | *                         | Fisher test |
|                                           |                       | Bicuculline         | Bic+AP5+7Cl                                             | 0.0737      |                           | Fisher test |
|                                           |                       | Bic+CGP+AP5+7Cl     | Bic+CGP                                                 | 0.462       |                           | Fisher test |
|                                           |                       | Bic+CGP+AP5+7Cl     | CGP                                                     | 0.313       |                           | Fisher test |
|                                           |                       | Bic+CGP+AP5+7Cl     | SNAP+SKF                                                | 0.23        |                           | Fisher test |
| Bic+CGP+AP5+7Cl                           |                       | DL-TBOA             | 0.066                                                   |             | Fisher test               |             |
| Bic+CGP+AP5+7Cl                           |                       | Bic+AP5+7Cl         | 0.368                                                   |             | Fisher test               |             |
| Bic+CGP                                   |                       | CGP                 | 0.123                                                   |             | Fisher test               |             |
| Bic+CGP                                   |                       | SNAP+SKF            | 0.61                                                    |             | Fisher test               |             |
| Bic+CGP                                   |                       | DL-TBOA             | 0.224                                                   |             | Fisher test               |             |
| Bic+CGP                                   |                       | Bic+AP5+7Cl         | 0.906                                                   |             | Fisher test               |             |
| CGP                                       | SNAP+SKF              | 0.0617              |                                                         | Fisher test |                           |             |
| CGP                                       | DL-TBOA               | 0.0189              | *                                                       | Fisher test |                           |             |

<sup>§</sup> Significance, \*  $p < 0.05$ , \*\*  $p < 0.01$ , \*\*\*  $p < 0.001$ .

**Table S2 (continued)**

| Figures                                   | Conditions/<br>Groups                               | Pair compared                                     |         |                 | P value                 | Significance <sup>§</sup> | Test          |
|-------------------------------------------|-----------------------------------------------------|---------------------------------------------------|---------|-----------------|-------------------------|---------------------------|---------------|
| Fig. 4b, 4c,<br>5b, 5c, 5d<br>(Continued) | S-D                                                 | CGP                                               |         | Bic+AP5+7Cl     | 0.0941                  |                           | Fisher test   |
|                                           |                                                     | SNAP+SKF                                          |         | DL-TBOA         | 0.47                    |                           | Fisher test   |
|                                           |                                                     | SNAP+SKF                                          |         | Bic+AP5+7Cl     | 0.67                    |                           | Fisher test   |
|                                           |                                                     | DL-TBOA                                           |         | Bic+AP5+7Cl     | 0.243                   |                           | Fisher test   |
|                                           | Multiple comparison<br>(with or without inhibitors) | M-D                                               | S-M     | S-D             | 0.269                   |                           | Two-way ANOVA |
|                                           | Multiple comparison<br>(M-D, S-M, S-D)              | 8 different conditions with or without inhibitors |         |                 | 7.64 X 10 <sup>-4</sup> | ***                       | Two-way ANOVA |
|                                           | M-D<br>S-M<br>S-D                                   | Control                                           |         | Bicuculline     | 0.00419                 | **                        | Fisher test   |
|                                           |                                                     | Control                                           |         | Bic+CGP+AP5+7Cl | 0.604                   |                           | Fisher test   |
|                                           |                                                     | Control                                           |         | Bic+CGP         | 0.612                   |                           | Fisher test   |
|                                           |                                                     | Control                                           |         | CGP             | 0.0247                  | *                         | Fisher test   |
|                                           |                                                     | Control                                           |         | SNAP+SKF        | 0.187                   |                           | Fisher test   |
|                                           |                                                     | Control                                           |         | DL-TBOA         | 0.0322                  | *                         | Fisher test   |
|                                           |                                                     | Control                                           |         | Bic+AP5+7Cl     | 0.393                   |                           | Fisher test   |
|                                           |                                                     | Bicuculline                                       |         | Bic+CGP+AP5+7Cl | 0.037                   | *                         | Fisher test   |
|                                           |                                                     | Bicuculline                                       |         | Bic+CGP         | 0.00255                 | **                        | Fisher test   |
|                                           |                                                     | Bicuculline                                       |         | CGP             | 0.578                   |                           | Fisher test   |
|                                           |                                                     | Bicuculline                                       |         | SNAP+SKF        | 0.145                   |                           | Fisher test   |
|                                           |                                                     | Bicuculline                                       |         | DL-TBOA         | 2.15 X 10 <sup>-5</sup> | ***                       | Fisher test   |
|                                           |                                                     | Bicuculline                                       |         | Bic+AP5+7Cl     | 0.0349                  | *                         | Fisher test   |
|                                           |                                                     | Bic+CGP+AP5+7Cl                                   |         | Bic+CGP         | 0.365                   |                           | Fisher test   |
|                                           |                                                     | Bic+CGP+AP5+7Cl                                   |         | CGP             | 0.126                   |                           | Fisher test   |
|                                           |                                                     | Bic+CGP+AP5+7Cl                                   |         | SNAP+SKF        | 0.493                   |                           | Fisher test   |
|                                           |                                                     | Bic+CGP+AP5+7Cl                                   |         | DL-TBOA         | 0.0198                  | *                         | Fisher test   |
|                                           |                                                     | Bic+CGP+AP5+7Cl                                   |         | Bic+AP5+7Cl     | 0.832                   |                           | Fisher test   |
|                                           |                                                     | Bic+CGP                                           |         | CGP             | 0.0139                  | *                         | Fisher test   |
|                                           |                                                     | Bic+CGP                                           |         | SNAP+SKF        | 0.103                   |                           | Fisher test   |
|                                           |                                                     | Bic+CGP                                           |         | DL-TBOA         | 0.125                   |                           | Fisher test   |
|                                           |                                                     | Bic+CGP                                           |         | Bic+AP5+7Cl     | 0.216                   |                           | Fisher test   |
|                                           |                                                     | CGP                                               |         | SNAP+SKF        | 0.374                   |                           | Fisher test   |
|                                           |                                                     | CGP                                               |         | DL-TBOA         | 1.83 X 10 <sup>-4</sup> | ***                       | Fisher test   |
| CGP                                       |                                                     | Bic+AP5+7Cl                                       | 0.135   |                 | Fisher test             |                           |               |
| SNAP+SKF                                  |                                                     | DL-TBOA                                           | 0.00255 | **              | Fisher test             |                           |               |
| SNAP+SKF                                  |                                                     | Bic+AP5+7Cl                                       | 0.581   |                 | Fisher test             |                           |               |
| DL-TBOA                                   |                                                     | Bic+AP5+7Cl                                       | 0.0056  | **              | Fisher test             |                           |               |

<sup>§</sup> Significance, \*  $p < 0.05$ , \*\*  $p < 0.01$ , \*\*\*  $p < 0.001$ .

**Table S2 (continued)**

| Figures | Conditions/<br>Groups | Pair compared                                                 |                 | P value                  | Significance <sup>§</sup> | Test          |
|---------|-----------------------|---------------------------------------------------------------|-----------------|--------------------------|---------------------------|---------------|
| Fig. 6a | Multiple comparison   | [ΔF/F0•dt (8 different conditions with or without inhibitors) |                 | 0                        | ***                       | One-way ANOVA |
|         | [ΔF/F0•dt             | Control                                                       | Bicuculline     | 2.26 X 10 <sup>-30</sup> | ***                       | Fisher test   |
|         |                       | Control                                                       | Bic+CGP+AP5+7Cl | 0.932                    |                           | Fisher test   |
|         |                       | Control                                                       | Bic+CGP         | 1.65 X 10 <sup>-9</sup>  | ***                       | Fisher test   |
|         |                       | Control                                                       | CGP             | 0.498                    |                           | Fisher test   |
|         |                       | Control                                                       | SNAP+SKF        | 0.173                    |                           | Fisher test   |
|         |                       | Control                                                       | DL-TBOA         | 0                        | ***                       | Fisher test   |
|         |                       | Control                                                       | Bic+AP5+7Cl     | 0.174                    |                           | Fisher test   |
|         |                       | Bicuculline                                                   | Bic+CGP+AP5+7Cl | 2.77 X 10 <sup>-24</sup> | ***                       | Fisher test   |
|         |                       | Bicuculline                                                   | Bic+CGP         | 1.39 X 10 <sup>-7</sup>  | ***                       | Fisher test   |
|         |                       | Bicuculline                                                   | CGP             | 7.97 X 10 <sup>-21</sup> | ***                       | Fisher test   |
|         |                       | Bicuculline                                                   | SNAP+SKF        | 6.98 X 10 <sup>-20</sup> | ***                       | Fisher test   |
|         |                       | Bicuculline                                                   | DL-TBOA         | 0                        | ***                       | Fisher test   |
|         |                       | Bicuculline                                                   | Bic+AP5+7Cl     | 5.57 X 10 <sup>-24</sup> | ***                       | Fisher test   |
|         |                       | Bic+CGP+AP5+7Cl                                               | Bic+CGP         | 1.11 X 10 <sup>-7</sup>  | ***                       | Fisher test   |
|         |                       | Bic+CGP+AP5+7Cl                                               | CGP             | 0.503                    |                           | Fisher test   |
|         |                       | Bic+CGP+AP5+7Cl                                               | SNAP+SKF        | 0.207                    |                           | Fisher test   |
|         |                       | Bic+CGP+AP5+7Cl                                               | DL-TBOA         | 0                        | ***                       | Fisher test   |
|         |                       | Bic+CGP+AP5+7Cl                                               | Bic+AP5+7Cl     | 0.22                     |                           | Fisher test   |
|         |                       | Bic+CGP                                                       | CGP             | 5.84 X 10 <sup>-6</sup>  | ***                       | Fisher test   |
|         |                       | Bic+CGP                                                       | SNAP+SKF        | 3.78 X 10 <sup>-5</sup>  | ***                       | Fisher test   |
|         |                       | Bic+CGP                                                       | DL-TBOA         | 0                        | ***                       | Fisher test   |
|         |                       | Bic+CGP                                                       | Bic+AP5+7Cl     | 2.62 X 10 <sup>-6</sup>  | ***                       | Fisher test   |
|         |                       | CGP                                                           | SNAP+SKF        | 0.577                    |                           | Fisher test   |
|         |                       | CGP                                                           | DL-TBOA         | 0                        | ***                       | Fisher test   |
|         |                       | CGP                                                           | Bic+AP5+7Cl     | 0.647                    |                           | Fisher test   |
|         |                       | SNAP+SKF                                                      | DL-TBOA         | 0                        | ***                       | Fisher test   |
|         |                       | SNAP+SKF                                                      | Bic+AP5+7Cl     | 0.875                    |                           | Fisher test   |
| DL-TBOA | Bic+AP5+7Cl           | 0                                                             | ***             | Fisher test              |                           |               |

<sup>§</sup> Significance, \*  $p < 0.05$ , \*\*  $p < 0.01$ , \*\*\*  $p < 0.001$ .

**Table S2 (continued)**

| Figures     | Conditions/<br>Groups                                               | Pair compared                                          |                 | P value               | Significance§ | Test              |
|-------------|---------------------------------------------------------------------|--------------------------------------------------------|-----------------|-----------------------|---------------|-------------------|
| Fig. S1a    | Control<br>( $\Delta F/F0 \cdot dt$ )                               | D-GCs                                                  | Other GCs       | 0.00719               | **            | KS test           |
|             |                                                                     | M-GCs                                                  | Other GCs       | $6.3 \times 10^{-13}$ | ***           | KS test           |
|             |                                                                     | S-GCs                                                  | Other GCs       | 0.00149               | **            | KS test           |
| Fig. S1b    | Control<br>(Peak $\Delta F/F0$ )                                    | D-GCs                                                  | Other GCs       | 0.0068                | **            | KS test           |
|             |                                                                     | M-GCs                                                  | Other GCs       | $7.74 \times 10^{-9}$ | ***           | KS test           |
|             |                                                                     | S-GCs                                                  | Other GCs       | $1.36 \times 10^{-4}$ | ***           | KS test           |
| Fig. S1c    | Control<br>( $\Delta F/F0 \cdot dt$ )                               | D-GCs                                                  | (Test median 0) | 0.158                 |               | Wilcoxon S-R test |
|             |                                                                     | M-GCs                                                  | (Test median 0) | $1.07 \times 10^{-4}$ | ***           | Wilcoxon S-R test |
|             |                                                                     | S-GCs                                                  | (Test median 0) | $9.09 \times 10^{-4}$ | ***           | Wilcoxon S-R test |
| Fig. S1d    | Control<br>(Peak $\Delta F/F0$ )                                    | D-GCs                                                  | (Test median 0) | 0.0468                | *             | Wilcoxon S-R test |
|             |                                                                     | M-GCs                                                  | (Test median 0) | $9.62 \times 10^{-5}$ | ***           | Wilcoxon S-R test |
|             |                                                                     | S-GCs                                                  | (Test median 0) | 0.00197               | **            | Wilcoxon S-R test |
| Fig. S2a    | Control<br>(Comparison of<br>neighboring<br>GCs)                    | D-GCs                                                  | (Test median 0) | 0.839                 |               | Wilcoxon S-R test |
|             |                                                                     | M-GCs                                                  | (Test median 0) | 0.915                 |               | Wilcoxon S-R test |
|             |                                                                     | S-GCs                                                  | (Test median 0) | 0.759                 |               | Wilcoxon S-R test |
| Fig. S2c    | Control<br>(Comparison of<br>randomly<br>sampled GCs)               | See Figure S2d                                         |                 |                       |               |                   |
| Fig. S3a    | Bicuculline<br>(Time to peak)                                       | D-GCs, M-GCs, S-GCs, and their<br>other GCs            |                 | 0.864                 |               | One-way ANOVA     |
|             |                                                                     | D-GCs                                                  | Other GCs       | 0.212                 |               | Fisher test       |
|             |                                                                     | M-GCs                                                  | Other GCs       | 0.874                 |               | Fisher test       |
|             |                                                                     | S-GCs                                                  | Other GCs       | 0.679                 |               | Fisher test       |
|             | Bicuculline<br>(Decay time<br>constant)                             | D-GCs, M-GCs, S-GCs, and their<br>other GCs            |                 | 0.592                 |               | One-way ANOVA     |
|             |                                                                     | D-GCs                                                  | Other GCs       | 0.972                 |               | Fisher test       |
|             |                                                                     | M-GCs                                                  | Other GCs       | 0.672                 |               | Fisher test       |
|             |                                                                     | S-GCs                                                  | Other GCs       | 0.414                 |               | Fisher test       |
| Fig. S3b    | Control<br>(Standardized<br>$\Delta F/F0 \cdot dt$ )                | D-GCs                                                  | (Test median 0) | 0.45                  |               | Wilcoxon S-R test |
|             |                                                                     | M-GCs                                                  | (Test median 0) | 0.0025                | **            | Wilcoxon S-R test |
|             |                                                                     | S-GCs                                                  | (Test median 0) | 0.0186                | *             | Wilcoxon S-R test |
|             | Bicuculline<br>(Standardized<br>$\Delta F/F0 \cdot dt$ )            | D-GCs                                                  | (Test median 0) | 0.692                 |               | Wilcoxon S-R test |
|             |                                                                     | M-GCs                                                  | (Test median 0) | 0.82                  |               | Wilcoxon S-R test |
|             |                                                                     | S-GCs                                                  | (Test median 0) | 0.022                 | *             | Wilcoxon S-R test |
|             | Multiple<br>comparison of<br>standardized<br>$\Delta F/F0 \cdot dt$ | D-GCs, M-GCs, and S-GCs with or<br>without bicuculline |                 | 0.0504                |               | One-way ANOVA     |
|             |                                                                     | D-GCs (CTL)                                            | D-GCs (Bic)     | 0.116                 |               | Fisher test       |
|             |                                                                     | M-GCs (CTL)                                            | M-GCs (Bic)     | 0.0139                | *             | Fisher test       |
| S-GCs (CTL) |                                                                     | S-GCs (Bic)                                            | 0.352           |                       | Fisher test   |                   |
| All (CTL)   |                                                                     | All (Bic)                                              | 0.971           |                       | Two-way ANOVA |                   |

§ Significance, \*  $p < 0.05$ , \*\*  $p < 0.01$ , \*\*\*  $p < 0.001$ .



**Table S2 (continued)**

| Figures | Conditions/<br>Groups               | Pair compared                                                                | <i>P</i> value          | Significance <sup>§</sup> | Test          |             |
|---------|-------------------------------------|------------------------------------------------------------------------------|-------------------------|---------------------------|---------------|-------------|
| Fig. S4 | Control<br>(Decay time<br>constant) | M-GCs and D-GCs in M-D,<br>S-GCs and M-GCs in S-M,<br>S-GCs and D-GCs in S-D | 0.972                   |                           | One-way ANOVA |             |
|         |                                     | M-GCs                                                                        | D-GCs                   | 0.796                     |               | Fisher test |
|         |                                     | S-GCs                                                                        | M-SGc                   | 0.799                     |               | Fisher test |
|         |                                     | S-GCs                                                                        | D-GCs                   | 0.819                     |               | Fisher test |
|         | DL-TBOA<br>(Decay time<br>constant) | M-GCs and D-GCs in M-D,<br>S-GCs and M-GCs in S-M,<br>S-GCs and D-GCs in S-D | 7.77 X 10 <sup>-4</sup> |                           | One-way ANOVA |             |
|         |                                     | M-GCs                                                                        | D-GCs                   | 0.905                     |               | Fisher test |
|         |                                     | S-GCs                                                                        | M-SGc                   | 0.973                     |               | Fisher test |
|         |                                     | S-GCs                                                                        | D-GCs                   | 0.845                     |               | Fisher test |
|         | Bic+CGP<br>(Decay time<br>constant) | M-GCs and D-GCs in M-D,<br>S-GCs and M-GCs in S-M,<br>S-GCs and D-GCs in S-D | 0.396                   |                           | One-way ANOVA |             |
|         |                                     | M-GCs                                                                        | D-GCs                   | 0.817                     |               | Fisher test |
|         |                                     | S-GCs                                                                        | M-SGc                   | 0.898                     |               | Fisher test |
|         |                                     | S-GCs                                                                        | D-GCs                   | 0.83                      |               | Fisher test |

<sup>§</sup> Significance, \*  $p < 0.05$ , \*\*  $p < 0.01$ , \*\*\*  $p < 0.001$ .
